# Supplementary material for: Bioinformatic and biochemical analysis uncovers novel activity in the 2-ER subfamily of OYEs
Source: Royal Society of Chemistry journal article supplement (doi:10.1039/d4cb00289j), 2025-01-01
Supplement: d4cb00289j1.pdf [file d4cb00289j1.pdf]

## Supplemental Information

Bioinformatic and biochemical analysis uncovers novel activity in the 2-ER Subfamily of OYEs

Tamra C. Blue, Stacey K. Jones, and Katherine M. Davis\*

Department of Chemistry, Emory University, Atlanta, Georgia 30322, United States

### Table of Contents

|                                                                                                    |    |
|----------------------------------------------------------------------------------------------------|----|
| <b>Table S1.</b> Domains identified in 2-ERs across all numbered clusters .....                    | 2  |
| <b>Table S2.</b> Substrate scope of <i>OYEBi</i> .....                                             | 3  |
| <b>Table S3.</b> Genomic neighborhood analysis .....                                               | 4  |
| <b>Figure S1.</b> SSN of the complete OYE family .....                                             | 5  |
| <b>Figure S2.</b> Taxonomy and average length of sequences of 2-ERs within the OYE family ...      | 6  |
| <b>Figure S3.</b> Prevalence of Pfam domains by 2-ER SSN cluster .....                             | 7  |
| <b>Figure S4.</b> Alignment of the <i>OYEBi</i> AlphaFold model and crystal structure of DCR ..... | 8  |
| <b>Figure S5.</b> X-band EPR spectra and oxygen exposure assay .....                               | 9  |
| <b>Figure S6.</b> Assessment of NAD <sup>+</sup> dependent activity .....                          | 10 |
| <b>Figure S7.</b> Plasmid cartoon diagrams .....                                                   | 11 |

**Table S1.** Domains identified in 2-ERs across all numbered clusters. FAD-dependent domains are highlighted in red.

| No. | Pfam                 | Domain                                                                                           | # nodes      | % prevalence |
|-----|----------------------|--------------------------------------------------------------------------------------------------|--------------|--------------|
| D1  | PF00724              | FMN-binding                                                                                      | 5744         | 100          |
| D2  | PF00070<br>(PF07992) | Pyridine nucleotide-disulphide oxidoreductase<br>(NADH-binding domain within FAD-binding domain) | 5073<br>(15) | 89           |
| D3  | PF13450              | FAD/NAD(P)-binding oxidoreductases                                                               | 345          | 6            |
| D4  | PF12831<br>(PF01266) | FAD-dependent oxidoreductases                                                                    | 87<br>(2)    | 1.5          |
| D5  | PF03486              | HI0933-like protein                                                                              | 29           | 0.5          |
| D6  | PF00070              | Pyridine nucleotide-disulphide oxidoreductase                                                    | 15           | 0.26         |
| D7  | PF06314              | Acetoacetate decarboxylase                                                                       | 14           | 0.24         |
| D8  | PF00890<br>(PF01494) | FAD-binding                                                                                      | 9<br>(2)     | 0.2          |
| D9  | PF00378              | Enoyl-CoA hydratase/isomerase                                                                    | 8            | 0.14         |
| D10 | PF01370              | NAD dependent epimerase/dehydratase family                                                       | 7            | 0.12         |
| D11 | PF10518              | TAT pathway signal sequence                                                                      | 4            | 0.07         |
| D12 | PF12680              | SnoaL-like domain                                                                                | 4            | 0.07         |
| D13 | PF01134              | Glucose inhibited division protein A                                                             | 3            | 0.05         |
| D14 | PF00582              | Universal stress protein family                                                                  | 2            | 0.03         |
| D15 | PF00753              | Metallo-beta-lactamase protein fold                                                              | 1            | 0.02         |
| D16 | PF00787              | PX domain                                                                                        | 1            | 0.02         |
| D17 | PF08790              | LYAR-type C2HC zinc finger                                                                       | 1            | 0.02         |
| D18 | PF07238              | PilZ domain                                                                                      | 1            | 0.02         |

**Table S2.** Substrate scope of OYEBi. Biotransformations were conducted in a 100 mM phosphate buffer, pH 8, supplemented with NADH.

|              | Anaerobic   | Pseudo-Anaerobic<br>(reconstituted) | Aerobic<br>(reconstituted) |
|--------------|-------------|-------------------------------------|----------------------------|
| <b>1→2</b>   | 100%        | 61.88±2.12%<br>(73.41±12.25%)       | 6.52±4.17<br>(7.93±3.26%)  |
| <b>2→1</b>   | n.d.        | n.d.                                | n.d.                       |
| <b>3→3P</b>  | 10.80±0.50% | 0.26±0.02%<br>(0.54±0.01%)          | 0.33±0.03%<br>(n.d.)       |
| <b>4→4P</b>  | n.d.        | n.d.<br>(0.32±0.01%)                | n.d.                       |
| <b>5→5P</b>  | 2.12±0.26%  | 2.11±0.04%<br>(1.82±0.22%)          | 0.21±0.01<br>(n.d.)        |
| <b>6→6P</b>  | 1.50±0.42%  | n.d.                                | n.d.                       |
| <b>7→7P</b>  | n.d.        | n.d.                                | n.d.                       |
| <b>8→8P</b>  | n.d.        | n.d.                                | n.d.                       |
| <b>9→9P</b>  | 22.16±2.24% | 8.59±0.20%<br>(13.66±0.32%)         | 1.94±0.12%<br>(0.10±0.04%) |
| <b>10→9</b>  | 1.50±0.12%  | n.d.<br>(0.63±0.01%)                | 7.06±0.38%<br>(2.31±0.22%) |
| <b>10→9P</b> | 2.29%±1.18% | 0.37±0.10%<br>(0.47±0.00)%          | 0.32±0.42%<br>(n.d.)       |

**Table S3.** Genomic neighborhood analysis.

| <b>Pfam accession #</b>        | <b>Description</b>                                                                                                               | <b>CoF</b> |
|--------------------------------|----------------------------------------------------------------------------------------------------------------------------------|------------|
| <b>PF01012</b>                 | Electron transfer flavoprotein domain (ETF)                                                                                      | 41%        |
| <b>PF00766-PF01012</b>         | Electron transfer flavoprotein FAD-binding domain fused to an electron transfer flavoprotein domain (ETF_alpha-ETF)              | 41%        |
| <b>PF00355-PF00848</b>         | a Rieske [2Fe-2S] domain fused to a ring hydroxylating alpha subunit catalytic domain (Rieske-Ring_hydroxyl_A)                   | 40%        |
| <b>PF00111-PF00175-PF00970</b> | 2Fe-2S cluster binding domain fused to an oxidoreductase NAD-binding domain and an oxidoreductase FAD-binding domain             | 38%        |
| <b>PF19367</b>                 | Domain of unknown function (DUF)                                                                                                 | 36%        |
| <b>PF00126-PF03466</b>         | bacterial regulatory helix-turn-helix protein of the lysR family fused to a lysR substrate binding domain (HTH_1-LysR_substrate) | 36%        |
| <b>PF01244</b>                 | Membrane dipeptidase (Peptidase family M19)                                                                                      | 36%        |
| <b>PF01965-PF12833</b>         | Domain of the DJ-1/PfpI family fused to a helix-turn-helix domain (DJ-1_PfpI-HTH_18)                                             | 35%        |
| <b>PF04069</b>                 | Substrate binding domain of a ABC-type glycine betaine transport system (OpuAC)                                                  | 34%        |
| <b>PF00528</b>                 | Binding protein dependent transport system inner membrane component (BPD_transp_1)                                               | 27%        |
| <b>PF00440</b>                 | Bacterial regulatory proteins of the tetR family (TetR_N)                                                                        | 24%        |
| <b>PF00005</b>                 | ABC transporter (ABC_tran)                                                                                                       | 21%        |
| <b>PF00107-PF08240</b>         | Zn-binding dehydrogenase domain fused to an alcohol dehydrogenase GroES-like domain (ADH_zinc_N-ADH_N)                           | 20%        |

2-Enoate reductases

Thermophilic

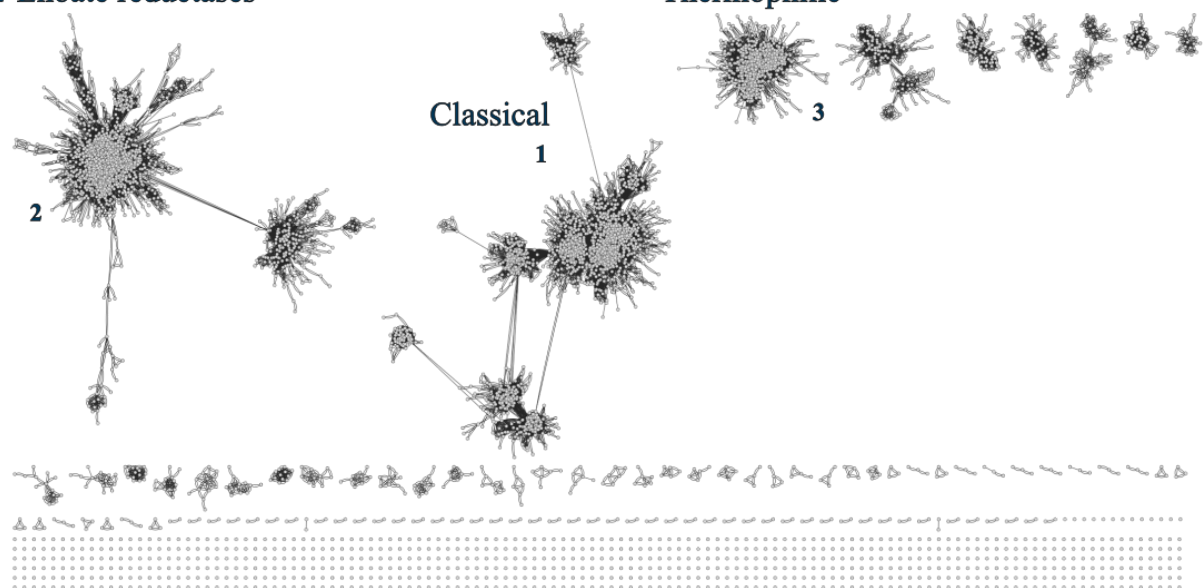

**Figure S1.** SSN of OYE family (PF00724).

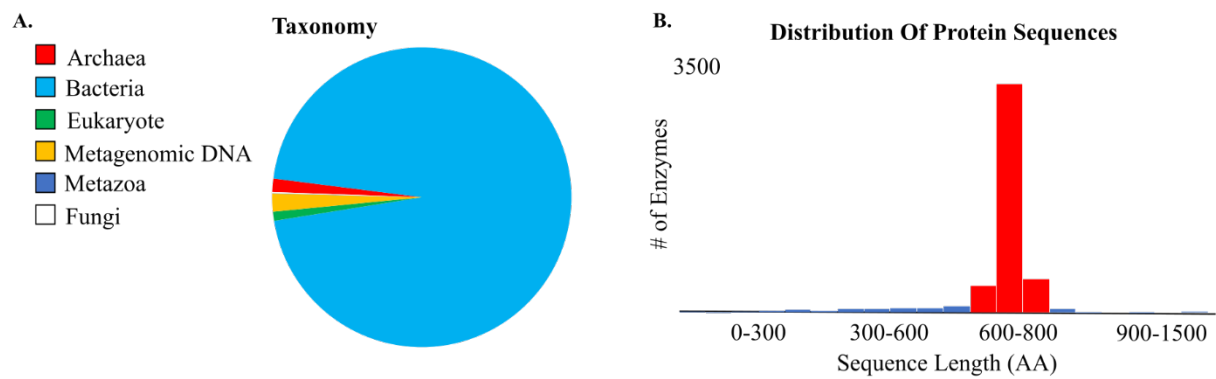

**Figure S2.** (A) Taxonomy and (B) average length of sequences of 2-ERs within the OYE family.

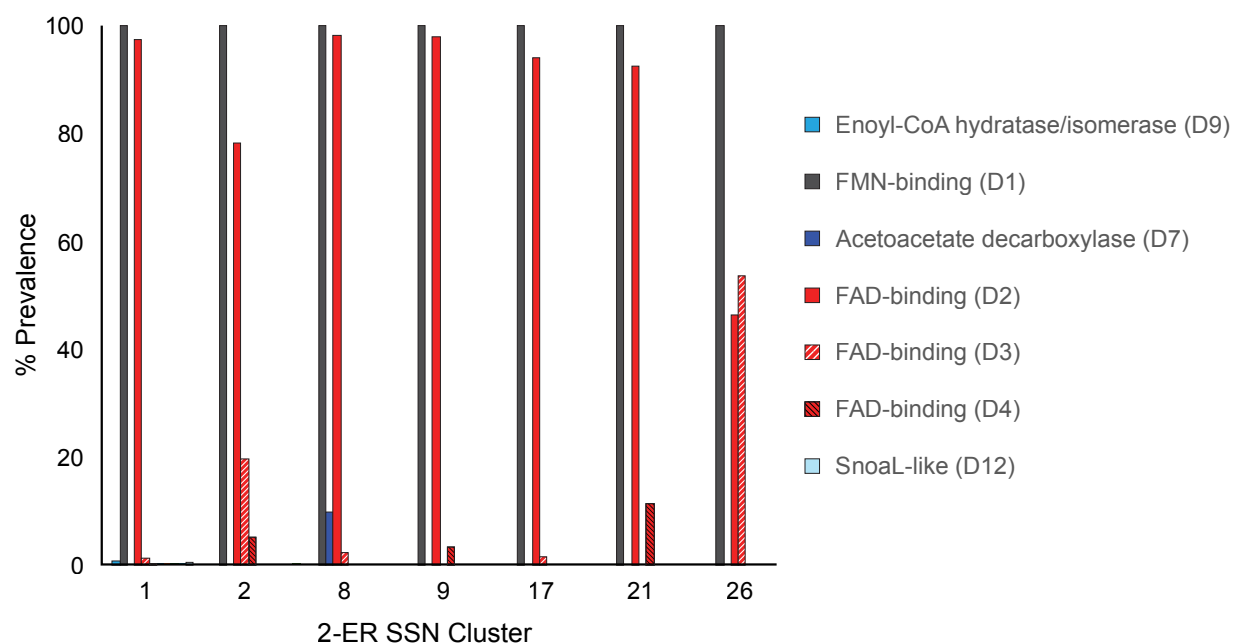

**Figure S3.** Prevalence of Pfam domains by 2-ER SSN cluster. Cluster 1 serves as the canonical 2-ER control. *OYE*B*i* is from cluster 2. Clusters 8, 9, 17, 21, and 26 lack the Fe/S cluster-binding motif. Domain numbering is according to Table S1. Note that domains with prevalence <0.25% are not visible in this chart.

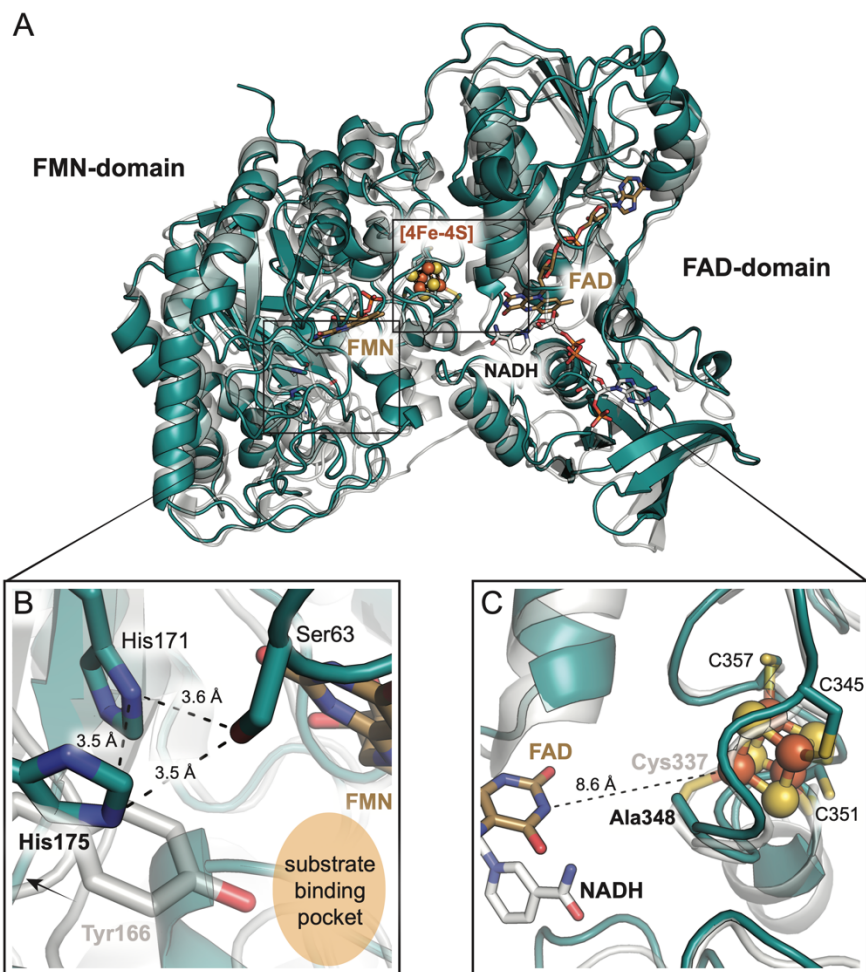

**Figure S4.** Alignment of the OYEBi AlphaFold model (teal) and the crystal structure of DCR (PDB accession code 1PS9; grey). Comparison of their (A) global structures, (B) active sites, and (C) Fe/S cluster-binding motifs.

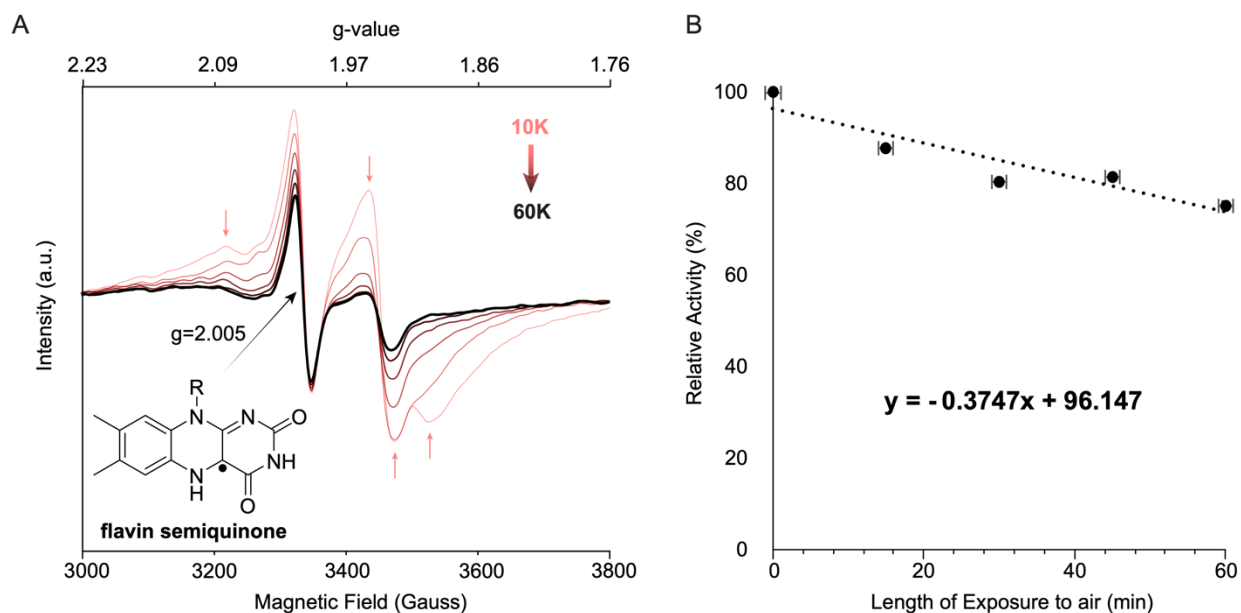

**Figure S5.** (A) X-band EPR spectra with increasing temperature depicts convergence to flavin radical signal upon loss of the rhombic features associated with the [4Fe-4S] cluster. (B) Reduction in activity upon exposure to oxygen assessed by GC-MS.

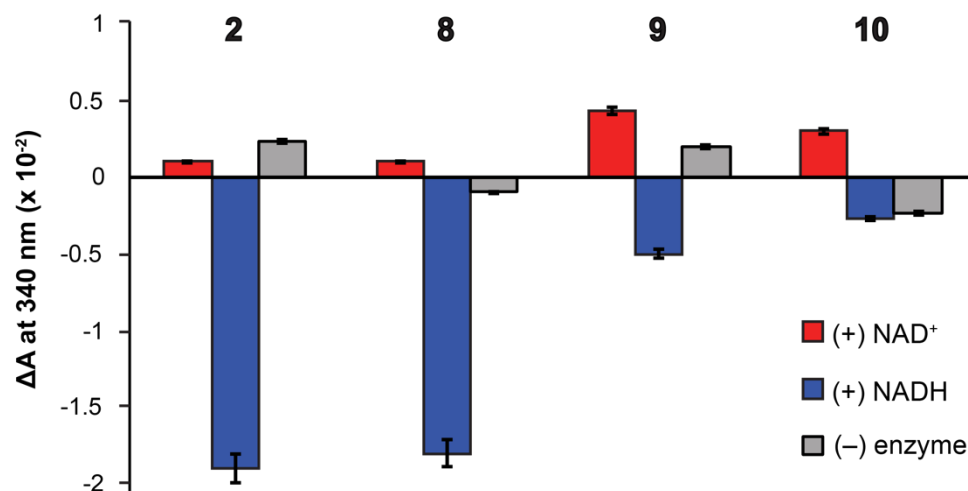

**Figure S6.** Assessment of  $NAD^+$  dependent activity.  $NADH$  production (red) or consumption (blue) by OYEBi in the presence of substrates probing oxidation activity were assessed by the change in absorbance at 340 nm. Assays conducted in the absence of glucose dehydrogenase and glucose revealed no detectable conversion of  $NAD^+$  to  $NADH$  for either demethylation or desaturase activity. A no enzyme control was also performed in the absence of enzyme and nicotinamide cofactor.

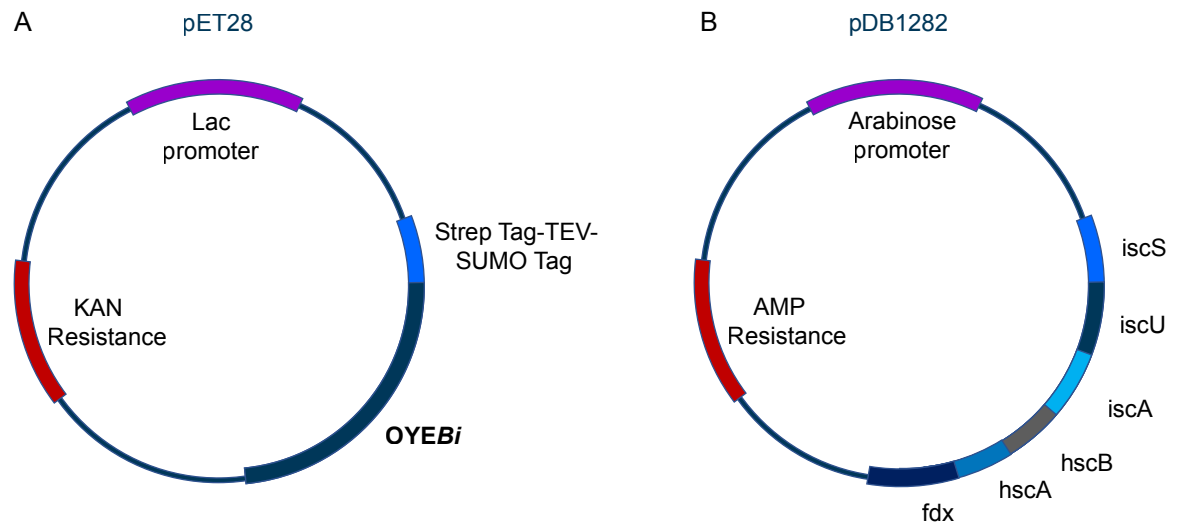

**Figure S7.** Cartoon representations of the (A) pET28 vector encoding *OYEBi* and (B) pDB1282 vector encoding the *isc* operon.
